# Supplementary material for: Elevated serum trimethylamine oxide levels as potential biomarker for diabetic kidney disease
Source: PubMed Central journal article supplement — Endocr Connect. 2023 Jul 5;12(8):e220542. doi: 10.1530/EC-22-0542 (PMC10388659; doi:10.1530/ec-22-0542), 2023-07-05
Supplement: supplementary_table_1.pdf [file supplementary_table_1.pdf]

Supplementary table 1. Clinical data of the high and low level groups of TMAO in the study population

|                                  | low TMAO level group<br>(n=70) | high TMAO level group<br>(n=71) | t/X <sup>2</sup> /Z | P        |
|----------------------------------|--------------------------------|---------------------------------|---------------------|----------|
| Age (year)                       | 49.20±12.19                    | 56.23±12.94                     | -3.317              | 0.001*** |
| Male                             | 71.4% (50/70)                  | 63.4% (45/71)                   | 1.039               | 0.308    |
| BMI (kg/m <sup>2</sup> )         | 24.58±3.748                    | 23.86±3.55                      | 1.177               | 0.241    |
| FPG (mmol/L)                     | 7.08 (5.48, 8.41)              | 7.39 (5.93, 9.88)               | -1.155              | 0.248    |
| BUN (mmol/L)                     | 4.54 (3.90, 5.74)              | 5.68 (4.70, 6.98)               | -3.961              | 0.000*** |
| UA (umol/L)                      | 318.5 (244.0, 390.25)          | 331 (290.0, 386.0)              | -0.940              | 0.347    |
| SCR (umol/L)                     | 66.5 (57.75, 76.0)             | 72.0 (58.20, 82.0)              | -1.695              | 0.09     |
| eGFR(ml/min•1.73m <sup>2</sup> ) | 114.01±24.88                   | 98.79±34.98                     | 2.974               | 0.003**  |

\*P &lt;0.05.
