# Supplementary material for: Elevated serum trimethylamine oxide levels as potential biomarker for diabetic kidney disease
Source: PubMed Central journal article supplement — Endocr Connect. 2023 Jul 5;12(8):e220542. doi: 10.1530/EC-22-0542 (PMC10388659; doi:10.1530/ec-22-0542), 2023-07-05
Supplement: supplementary_table_2.pdf [file supplementary_table_2.pdf]

Supplementary table 2.Linear correlation analysis between serum TMAO and clinical characteristic

| Variables                        | TMAO   |          |
|----------------------------------|--------|----------|
|                                  | r      | P        |
| Age (year)                       | 0.304  | 0.000*** |
| Male                             | -0.001 | 0.993    |
| BMI (kg/m <sup>2</sup> )         | -0.052 | 0.539    |
| FPG (mmol/L)                     | 0.119  | 0.159    |
| BUN (mmol/L)                     | 0.440  | 0.000*** |
| UA (umol/L)                      | 0.187  | 0.026    |
| SCR(umol/L)                      | 0.308  | 0.000*** |
| eGFR(ml/min/1.73m <sup>2</sup> ) | -0.370 | 0.000*** |

\*P < 0.05.
